# Supplementary material
Source: PubMed Central journal article supplement (PMC4432054)
Supplement: JCM.03026-14_zjm999094274so1.pdf [file JCM.03026-14_zjm999094274so1.pdf]

Table 1S. Sequence of PCR primer pairs used for *bla* characterization

| DNA target                        | Primer Sequence (5' to 3')      |                                 |
|-----------------------------------|---------------------------------|---------------------------------|
|                                   | Forward                         | Reverse                         |
| <i>bla</i> <sub>KPC</sub>         | AAC AAG GAA TAT CGT TGA TG      | AGA TGA TTT TCA GAG CCT TA      |
| <i>bla</i> <sub>GES</sub>         | CAA AGA TAA TTT CCA TCT CAA G   | TCA ACT ATT TGT CCG TGC TC      |
| <i>bla</i> <sub>Sme</sub>         | AAC GGC TTC ATT TTT GTT TAG     | GCT TCC GCA ATA GTT TTA TCA     |
| <i>bla</i> <sub>NMC-A/IMI</sub>   | CAG AGC AAA TGA ACG ATT TC      | TGG TAC GCT AGC ACG AAT AC      |
| <i>bla</i> <sub>IMP</sub>         | GTG GTT TGG TTA CCT GAA AA      | CCG CCT TGT TAG AAA TTT AG      |
| <i>bla</i> <sub>VIM</sub>         | CTC TCT AGA AGG ACT CTC ATC     | TGT TAT GCC GCA TCT GCC TG      |
| <i>bla</i> <sub>NDM</sub>         | CTA TTT ACT AGG CCT CGC ATT     | ATA AAA CGC CTC TGT CAC AT      |
| <i>bla</i> <sub>SPM</sub>         | AGA CCG CGA TTT CTA TTC TT      | AGT TCC TTC GGC TTT ATC AT      |
| <i>bla</i> <sub>OXA-48-like</sub> | TAA GCA AGG GGA CGT TAT GC      | CAC ACA AAT ACG CGC TAA CC      |
| <i>bla</i> <sub>OXA-51</sub>      | CTC GTG CTT CGA CCG AGT AT      | GCT GAA CAA CCC ATC CAG TT      |
| <i>bla</i> <sub>OXA-23</sub>      | TCG GAT TGG AGA ACC AGA AAA     | GTA TAG ATG CCG GCA TTT CTG A   |
| <i>bla</i> <sub>OXA-58</sub>      | AAG TAT TGG GGC TTG TGC TG      | TAC GAC GTG CCA ATT CTT GA      |
| <i>bla</i> <sub>CTX-M</sub>       | GAT AAA GTG ACG GCG TTT G       | CTC GGT TCT GTC CAG ACG         |
| <i>bla</i> <sub>PER</sub>         | GTG TGG GAG CCT GAC GAT CT      | CTS TGG TCC TGT GGT GGT TTC     |
| <i>bla</i> <sub>VEB</sub>         | GAT AGG AGT ACA GAC ATA TG      | TTT ATT CAA ATA GTA ATT CCA CG  |
| <i>bla</i> <sub>SHV</sub>         | GCC CGG GTT ATT CTT ATT TGT CGC | TCT TTC CGA TGC CGC CGC CAG TCA |
| <i>bla</i> <sub>TEM</sub>         | ATA AAA TTC TTG AAG AC          | ACT TGG TCT GAC AGT TA          |
| <i>bla</i> <sub>CMY</sub>         | TGG CCA GAA CTG ACA GGC AAA     | TTT CTC CTG AAC GTG GCT GGC     |
| <i>bla</i> <sub>MOX</sub>         | GCT GCT CAA GGA GCA CAG GAT     | CAC ATT GAC ATA GGT GTG GTG C   |
| <i>bla</i> <sub>DHA</sub>         | AAC TTT CAC AGG TGT GCT GGG T   | CCG TAC GCA TAC TGG CTT TGC     |
